# Supplementary material
Source: PubMed Central journal article supplement (PMC6599981)
Supplement: rspb20191063supp1.pdf [file rspb20191063supp1.pdf]

**Figure S1:** Scaling relationship between log RMR and log relative weapon muscle mass A (muscle mass/body size; top) and log relative muscle mass B (muscle mass/body mass; bottom) for stick insects, frog-legged beetles, and stag beetles. Red lines represent OLS regression. Shaded areas represent 95% confidence intervals around OLS regressions.

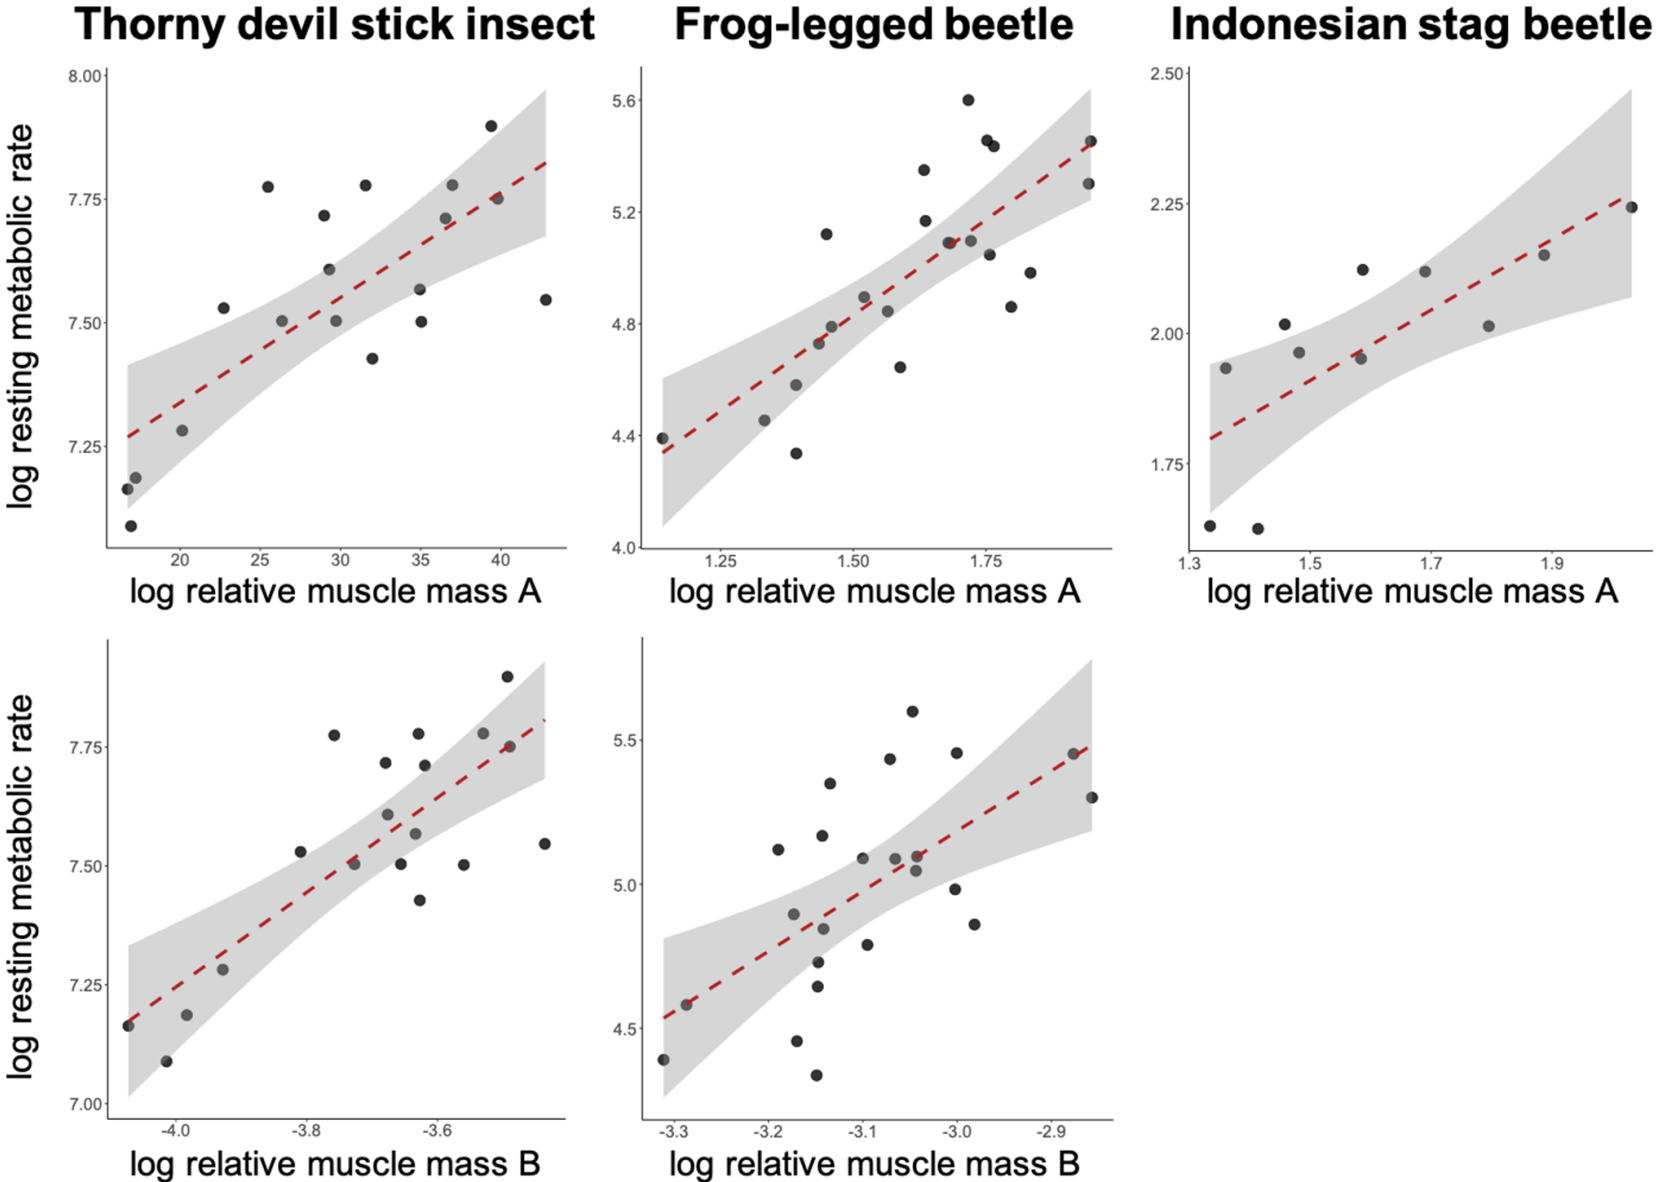

**Table S1:** Source and rearing data for study species. All animals were fed *ad libidum*. \*New Zealand long-legged harvestmen measured shortly after capture and immediately returned to the wild.

| Common name                | Species                       | RMR measure location | Source location                   | Supplier                            | Stage collected | Rearing location | Rearing T (C) | Juvenile Food source                         | Adult food source                          |
|----------------------------|-------------------------------|----------------------|-----------------------------------|-------------------------------------|-----------------|------------------|---------------|----------------------------------------------|--------------------------------------------|
| Thorny devil stick insect  | <i>Eurycantha calcarata</i>   | Montana, USA         | West New Britan, Papua New Guinea | Missoula Insectarium                | Juvenile        | Montana, USA     | 22            | Maple and raspberry leaves                   | Maple and raspberry leaves                 |
| NZ long-legged harvestmen  | <i>Forsteropsalis pureora</i> | Waitomo, New Zealand | Waitomo, New Zealand              | Wild caught                         | Adult           | NA               | NA            | NA                                           | NA*                                        |
| Frog-legged leaf beetle    | <i>Sagra femorata</i>         | Okazaki, Japan       | Matsuzaka, Japan                  | Wild caught                         | Adult           | NA               | NA            | NA                                           | Kudzu leaves ( <i>Pueraria</i> spp.)       |
| Leaf-footed cactus bug     | <i>Narnia femorata</i>        | Montana, USA         | Florida, USA                      | Wild caught                         | Juvenile        | Montana, USA     | 28            | Cactus fruit and pads ( <i>Opuntia</i> spp.) | Cactus fruit and pads ( <i>Opuntia</i> sp) |
| Indonesian stag beetle     | <i>Cyclommatus metallifer</i> | Montana, USA         | Nagoya, Japan                     | University of Nagoya (captive bred) | Adult           | NA               | NA            | NA                                           | Organic apples                             |
| Japanese rhinoceros beetle | <i>Trypoxylus dichotomus</i>  | Montana, USA         | Hamada City, Japan                | Yasaka Kobuto Kuwagata World        | Larvae          | Montana, USA     | 28            | Composted wood shavings                      | Organic apples                             |
| Heliconia bug              | <i>Leptoscelis tricolor</i>   | Gamboa, Panama       | Gamboa, Panama                    | Wild caught                         | Adult           | NA               | NA            | NA                                           | Heliconia flower ( <i>H. platystach</i>    |

**Table S2:** Measurements of weapon and body size included as variables in principal components analyses (rounded to the nearest hundredth), % variation explained by PC1 in weapon size or body size PCAs, and section of weapon dissected for muscle digestion for each species. Bold measures of weapon/body size were used for scaling analyses.

| <b>Common name</b>         | <b>Weapon measures</b>                                                          | <b>Weapon size PC1</b> | <b>Body size measures</b>                                                                    | <b>Body size PC1</b> | <b>Muscle mass dissection</b>  |
|----------------------------|---------------------------------------------------------------------------------|------------------------|----------------------------------------------------------------------------------------------|----------------------|--------------------------------|
| Thorny devil stick insect  | <b>Hindfemur area</b>                                                           | NA                     | <b>Mesothrax width</b><br>Body length                                                        | 76.62%               | Whole hindlimb                 |
| NZ long-legged harvestman  | <b>Chela length</b><br>Chela width                                              | 65.93%                 | <b>Prosoma width</b>                                                                         | NA                   | Right chela                    |
| Frog-legged leaf beetle    | <b>Hindfemur length</b><br>Hindfemur width<br>Hindtibia length                  | 95%                    | <b>Prothorax width</b><br>Elytra length                                                      | 97.59%               | Whole hindlimb                 |
| Leaf-footed cactus bug     | <b>Hindfemur length</b><br>Hindfemur area<br>Hindtibia length<br>Hindtibia area | 90.31%                 | <b>Prothorax width</b><br>Body length<br>Head length<br>Foretibia length<br>Forefemur length | 79.56%               | Whole hindlimb                 |
| Indonesian stag beetle     | <b>Mandible length</b><br>Head width                                            | 86.28%                 | <b>Prothorax width</b><br>Elytra length<br>Foretibia length                                  | 87.66%               | Mandibles<br>Head              |
| Japanese rhinoceros beetle | <b>Head horn length</b><br>Head horn width                                      | 92.37%                 | <b>Prothorax width</b><br>Elytra length                                                      | 96.38%               | Head horn<br>Head<br>Prothorax |
| Heliconia bug              | <b>Femur width</b>                                                              | NA                     | <b>Prothorax width</b>                                                                       | NA                   | Whole hindlimb                 |

**Table S3:** Summary of multiple regression models (resting metabolic rate (RMR) regressed on overall weapon size and body size (RMR~body size\*weapon size) within the same model).

| Common name                | Parameters            | $\beta$   | SE     | $p$   | Adjusted R <sup>2</sup> | F <sub>df</sub>       | $p$      |
|----------------------------|-----------------------|-----------|--------|-------|-------------------------|-----------------------|----------|
| Thorny devil stick insect  | Body size             | -0.81     | 1.53   | 0.605 | 0.62                    | 10.81 <sub>3,15</sub> | < 0.001  |
|                            | Weapon size           | 1.283     | 0.502  | 0.05  |                         |                       |          |
|                            | Body size*weapon size | 0.138     | 0.27   | 0.591 |                         |                       |          |
| NZ long-legged harvestmen  | Body size             | 3.1004    | 1.33   | 0.029 | 0.135                   | 2.351 <sub>3,23</sub> | 0.09     |
|                            | Weapon size           | 0.826     | 1.29   | 0.53  |                         |                       |          |
|                            | Body size*weapon size | -0.971    | 1.094  | 0.384 |                         |                       |          |
| Frog-legged beetle         | Body size             | -0.089    | 0.128  | 0.494 | 0.651                   | 14.65 <sub>3,19</sub> | < 0.0001 |
|                            | Weapon size           | 0.259     | 0.104  | 0.022 |                         |                       |          |
|                            | Body size*weapon size | -0.018    | 0.026  | 0.5   |                         |                       |          |
| Leaf-footed cactus bug     | Body size             | 0.175     | 0.149  | 0.248 | -0.01                   | 0.869 <sub>3,35</sub> | 0.467    |
|                            | Weapon size           | -0.111    | 0.153  | 0.472 |                         |                       |          |
|                            | Body size*weapon size | -0.009    | 0.016  | 0.575 |                         |                       |          |
| Indonesian stag beetle     | Body size             | 1.600E-04 | 0.031  | 0.999 | 0.778                   | 15.03 <sub>3,9</sub>  | < 0.001  |
|                            | Weapon size           | 1.330E-01 | 0.037  | 0.006 |                         |                       |          |
|                            | Body size*weapon size | -0.024    | 0.012  | 0.079 |                         |                       |          |
| Japanese rhinoceros beetle | Body size             | -0.427    | 0.321  | 0.207 | 1.00E-04                | 1.001 <sub>3,12</sub> | 0.426    |
|                            | Weapon size           | 0.49      | 0.326  | 0.159 |                         |                       |          |
|                            | Body size*weapon size | 0.043     | 0.091  | 0.646 |                         |                       |          |
| Heliconia bug              | Body size             | 0.194     | 4.957  | 0.969 | 0.013                   | 1.09 <sub>3,18</sub>  | 0.379    |
|                            | Weapon size           | 14.411    | 16.473 | 0.393 |                         |                       |          |
|                            | Body size*weapon size | -6.749    | 8.877  | 0.457 |                         |                       |          |

**Table S4:** Summary of relative muscle mass A (RMM-A) and B (RMM-B) for each species. \*measured as wet muscle mass. Relative muscle mass A = muscle mass/linear measurements of body size. Relative muscle mass B = muscle mass/body mass.

| <b>Common name</b>          | <b>Mean (RMM-A)</b> | <b>95% CI (mean RMM-A)</b> | <b>Mean (RMM-B)</b> | <b>95% CI (mean RMM-B)</b> |
|-----------------------------|---------------------|----------------------------|---------------------|----------------------------|
| Thorny devil stick insect   | 29.614              | [25.699, 33.528]           | 0.025               | [0.023, 0.027]             |
| NZ long-legged harvestmen   | 0.141               | [0.098, 0.185]             | 0.006               | [0.004, 0.008]             |
| Frog-legged leaf beetle     | 5.124               | [4.691, 5.556]             | 0.206               | [0.186, 0.225]             |
| Leaf-footed cactus bug      | 0.278               | [0.247, 0.309]             | 2.06E-05            | [1.895E-05, 2.223E-05]     |
| Indonesian stag beetle      | 5.085               | [4.264, 5.906]             | 0.035               | NA                         |
| Japanese rhinoceros beetle* | 77.724              | [73.969, 81.479]           | 0.325               | [0.323, 0.327]             |
| Heliconia bug               | 13.774              | [25.559, 1.988]            | 0.007               | [0.013, 0.001]             |
